# Supplementary material for: A robust empirical seasonal prediction of winter NAO and surface climate
Source: PubMed Central journal article supplement (PMC5428292; doi:10.1038/s41598-017-00353-y), 2017-03-21
Supplement: 41598_2017_353_MOESM1_ESM.pdf [file 41598_2017_353_MOESM1_ESM.pdf]

1  
2  
3  
4  
5  
6

**Supplementary Tables and Figures for**

**A robust empirical seasonal prediction of winter NAO and surface climate**

**L. Wang<sup>1</sup>, M. Ting<sup>1</sup>, and P. J. Kushner<sup>2</sup>**

<sup>1</sup>Lamont-Doherty Earth Observatory, Columbia University, Palisades, New York.

<sup>2</sup>Department of Physics, University of Toronto, Toronto, Ontario, Canada.

7 **Supplementary Table S1a.** List of potential predictors

|     | Variable | Mode | Month     |
|-----|----------|------|-----------|
| P01 | Z70hPa   | PC1  | October   |
| P02 | SST      | PC1  | October   |
| P03 | SIC      | PC1  | October   |
| P04 | Z70hPa   | PC2  | October   |
| P05 | SST      | PC2  | October   |
| P06 | SIC      | PC2  | October   |
| P07 | Z70hPa   | PC3  | October   |
| P08 | SST      | PC3  | October   |
| P09 | SIC      | PC3  | October   |
| P10 | Z70hPa   | PC1  | September |
| P11 | SST      | PC1  | September |
| P12 | SIC      | PC1  | September |
| P13 | Z70hPa   | PC2  | September |
| P14 | SST      | PC2  | September |
| P15 | SIC      | PC2  | September |
| P16 | Z70hPa   | PC3  | September |
| P17 | SST      | PC3  | September |
| P18 | SIC      | PC3  | September |

8 The three predictors selected for the NAO prediction are highlighted.

9

10 **Supplementary Table S1b.** Cross correlation coefficients between potential predictors and DJF  
11 NAO index

|     | NAO         | P01   | P02   | P03          | P04   | P05   | P06   | P07   | P08   | P09   | P10   | P11   | P12   | P13   | P14   | P15   | P16   | P17   | P18   |
|-----|-------------|-------|-------|--------------|-------|-------|-------|-------|-------|-------|-------|-------|-------|-------|-------|-------|-------|-------|-------|
| P01 | 0.20        | 1.00  | 0.15  | -0.18        | -0.40 | 0.29  | 0.15  | 0.41  | 0.53  | -0.26 | -0.08 | 0.14  | -0.22 | 0.19  | 0.32  | 0.16  | 0.19  | 0.50  | -0.28 |
| P02 | 0.07        | 0.15  | 1.00  | -0.19        | -0.26 | -0.10 | -0.11 | 0.17  | 0.18  | 0.02  | 0.16  | 0.97  | -0.24 | 0.07  | -0.12 | -0.15 | 0.33  | 0.20  | -0.12 |
| P03 | <b>0.51</b> | -0.18 | -0.19 | 1.00         | -0.07 | -0.15 | 0.20  | -0.21 | -0.54 | 0.59  | -0.11 | -0.15 | 0.83  | -0.17 | -0.18 | 0.17  | -0.23 | -0.49 | 0.68  |
| P04 | <b>0.45</b> | -0.40 | -0.26 | -0.07        | 1.00  | 0.08  | 0.14  | -0.07 | 0.02  | -0.08 | 0.10  | -0.23 | 0.09  | -0.33 | -0.09 | 0.00  | -0.42 | -0.03 | 0.11  |
| P05 | 0.05        | 0.29  | -0.10 | -0.15        | 0.08  | 1.00  | 0.11  | -0.20 | 0.09  | -0.16 | -0.26 | -0.01 | -0.11 | 0.13  | 0.92  | 0.10  | 0.14  | 0.18  | -0.08 |
| P06 | 0.06        | 0.15  | -0.11 | 0.20         | 0.14  | 0.11  | 1.00  | -0.20 | 0.04  | -0.15 | 0.23  | -0.06 | 0.14  | -0.35 | 0.13  | 0.89  | -0.07 | 0.13  | -0.11 |
| P07 | 0.12        | 0.41  | 0.17  | -0.21        | -0.07 | -0.20 | -0.20 | 1.00  | 0.44  | 0.05  | -0.04 | 0.13  | -0.19 | 0.02  | -0.16 | -0.15 | 0.03  | 0.20  | -0.11 |
| P08 | 0.06        | 0.53  | 0.18  | -0.54        | 0.02  | 0.09  | 0.04  | 0.44  | 1.00  | -0.51 | 0.06  | 0.17  | -0.59 | 0.23  | 0.12  | -0.02 | 0.28  | 0.86  | -0.57 |
| P09 | 0.26        | -0.26 | 0.02  | 0.59         | -0.08 | -0.16 | -0.15 | 0.05  | -0.51 | 1.00  | 0.13  | 0.02  | 0.47  | -0.00 | -0.18 | -0.12 | -0.15 | -0.59 | 0.67  |
| P10 | 0.14        | -0.08 | 0.16  | -0.11        | 0.10  | -0.26 | 0.23  | -0.04 | 0.06  | 0.13  | 1.00  | 0.17  | -0.19 | -0.26 | -0.28 | 0.11  | -0.21 | 0.11  | -0.01 |
| P11 | 0.10        | 0.14  | 0.97  | -0.15        | -0.23 | -0.01 | -0.06 | 0.13  | 0.17  | 0.02  | 0.17  | 1.00  | -0.21 | 0.06  | -0.04 | -0.12 | 0.26  | 0.23  | -0.09 |
| P12 | 0.22        | -0.22 | -0.24 | 0.83         | 0.09  | -0.11 | 0.14  | -0.19 | -0.59 | 0.47  | -0.19 | -0.21 | 1.00  | -0.20 | -0.10 | 0.08  | -0.32 | -0.53 | 0.86  |
| P13 | 0.13        | 0.19  | 0.07  | -0.17        | -0.33 | 0.13  | -0.35 | 0.02  | 0.23  | -0.00 | -0.26 | 0.06  | -0.20 | 1.00  | 0.17  | -0.38 | 0.27  | 0.13  | -0.18 |
| P14 | 0.04        | 0.32  | -0.12 | -0.18        | -0.09 | 0.92  | 0.13  | -0.16 | 0.12  | -0.18 | -0.28 | -0.04 | -0.10 | 0.17  | 1.00  | 0.18  | 0.25  | 0.19  | -0.12 |
| P15 | 0.11        | 0.16  | -0.15 | 0.17         | 0.00  | 0.10  | 0.89  | -0.15 | -0.02 | -0.12 | 0.11  | -0.12 | 0.08  | -0.38 | 0.18  | 1.00  | -0.09 | 0.03  | -0.21 |
| P16 | 0.29        | 0.19  | 0.33  | -0.23        | -0.42 | 0.14  | -0.07 | 0.03  | 0.28  | -0.15 | -0.21 | 0.26  | -0.32 | 0.27  | 0.25  | -0.09 | 1.00  | 0.37  | -0.27 |
| P17 | 0.17        | 0.50  | 0.20  | <b>-0.49</b> | -0.03 | 0.18  | 0.13  | 0.20  | 0.86  | -0.59 | 0.11  | 0.23  | -0.53 | 0.13  | 0.19  | 0.03  | 0.37  | 1.00  | -0.52 |
| P18 | 0.12        | -0.28 | -0.12 | 0.68         | 0.11  | -0.08 | -0.11 | -0.11 | -0.57 | 0.67  | -0.01 | -0.09 | 0.86  | -0.18 | -0.12 | -0.21 | -0.27 | -0.52 | 1.00  |

12 Predictors that have significant correlation with the NAO index are highlighted in green. The  
13 significant correlation among three selected predictors is highlighted in yellow.

14 **Supplementary Table S1c.** Forecast skill in ACC for the hindcast and take- $N$ -year-out cross-  
 15 validation in the forward stepwise selection

|    |     | Variable | Mode | Month     | Hindcast | $N=1$ | $N=6$ | $N=12$ |
|----|-----|----------|------|-----------|----------|-------|-------|--------|
| 1  | P03 | SIC      | PC1  | October   | 0.51     | 0.47  | 0.47  | 0.48   |
| 2  | P17 | SST      | PC3  | September | 0.70     | 0.64  | 0.60  | 0.58   |
| 3  | P04 | Z70hPa   | PC2  | October   | 0.80     | 0.76  | 0.71  | 0.69   |
| 4  | P12 | SIC      | PC1  | September | 0.81     | 0.77  | 0.73  | 0.70   |
| 5  | P16 | Z70hPa   | PC3  | September | 0.82     | 0.76  | 0.73  | 0.71   |
| 6  | P06 | SIC      | PC2  | October   | 0.83     | 0.74  | 0.73  | 0.71   |
| 7  | P15 | SIC      | PC2  | September | 0.85     | 0.75  | 0.71  | 0.67   |
| 8  | P07 | Z70hPa   | PC3  | October   | 0.85     | 0.71  | 0.70  | 0.68   |
| 9  | P09 | SIC      | PC3  | October   | 0.86     | 0.72  | 0.73  | 0.69   |
| 10 | P18 | SIC      | PC3  | September | 0.87     | 0.71  | 0.68  | 0.68   |
| 11 | P08 | SST      | PC3  | October   | 0.87     | 0.69  | 0.67  | 0.58   |
| 12 | P10 | Z70hPa   | PC1  | September | 0.87     | 0.67  | 0.65  | 0.56   |
| 13 | P05 | SST      | PC2  | October   | 0.88     | 0.65  | 0.60  | 0.48   |
| 14 | P14 | SST      | PC2  | September | 0.88     | 0.65  | 0.60  | 0.41   |
| 15 | P01 | Z70hPa   | PC1  | October   | 0.89     | 0.64  | 0.58  | 0.38   |
| 16 | P11 | SST      | PC1  | September | 0.89     | 0.63  | 0.57  | 0.33   |
| 17 | P02 | SST      | PC1  | October   | 0.89     | 0.62  | 0.56  | 0.36   |
| 18 | P13 | Z70hPa   | PC2  | September | 0.89     | 0.61  | 0.55  | 0.35   |

16

17

18 **Supplementary Table S2a.** Contributions of individual predictors in the hindcast

| Year | NAO   | Hindcast | $\alpha \times \text{SIC}$ | $\beta \times \text{Z70hPa}$ | $\gamma \times \text{SST}$ |
|------|-------|----------|----------------------------|------------------------------|----------------------------|
| 1980 | -0.55 | -1.22    | -1.23                      | 0.47                         | -0.45                      |
| 1981 | 0.59  | -0.02    | -0.14                      | 0.26                         | -0.14                      |
| 1982 | -1.03 | -1.71    | -0.37                      | -0.74                        | -0.60                      |
| 1983 | 0.95  | 0.70     | 0.61                       | -0.08                        | 0.17                       |
| 1984 | 0.79  | 0.27     | -0.95                      | 0.29                         | 0.93                       |
| 1985 | -1.25 | -1.81    | -1.66                      | -0.92                        | 0.78                       |
| 1986 | -1.28 | -1.04    | -1.36                      | 0.15                         | 0.17                       |
| 1987 | -0.86 | -0.78    | 0.18                       | -0.70                        | -0.26                      |
| 1988 | -0.47 | -0.30    | 0.56                       | -0.19                        | -0.67                      |
| 1989 | 1.59  | 1.38     | 1.10                       | 0.34                         | -0.05                      |
| 1990 | 0.93  | 0.97     | 0.73                       | 0.18                         | 0.07                       |
| 1991 | 0.34  | 0.76     | -0.27                      | 0.27                         | 0.75                       |
| 1992 | 0.71  | 0.70     | 0.45                       | -0.08                        | 0.33                       |
| 1993 | 1.15  | 2.33     | 1.17                       | 0.93                         | 0.23                       |
| 1994 | 0.05  | 0.78     | 1.11                       | 0.05                         | -0.38                      |
| 1995 | 1.25  | 1.46     | -0.12                      | 0.53                         | 1.05                       |
| 1996 | -1.52 | -0.50    | -1.10                      | 0.38                         | 0.22                       |
| 1997 | -0.36 | -0.17    | 0.65                       | -0.04                        | -0.78                      |
| 1998 | -0.34 | -0.53    | 0.01                       | -0.03                        | -0.50                      |
| 1999 | 0.81  | 1.49     | 1.62                       | 0.14                         | -0.27                      |
| 2000 | 1.22  | 0.75     | 0.89                       | -0.59                        | 0.45                       |
| 2001 | -0.94 | -0.03    | -0.04                      | -0.28                        | 0.30                       |
| 2002 | 0.08  | 0.21     | -0.39                      | 0.11                         | 0.49                       |
| 2003 | -0.74 | -0.89    | 1.25                       | -1.33                        | -0.81                      |
| 2004 | -0.62 | 0.15     | 1.10                       | 0.14                         | -1.09                      |
| 2005 | 0.75  | -0.31    | 0.28                       | 0.08                         | -0.67                      |
| 2006 | -0.58 | -0.03    | -0.09                      | 0.67                         | -0.61                      |
| 2007 | 0.52  | 0.73     | 1.00                       | -0.04                        | -0.23                      |
| 2008 | 0.65  | -0.79    | -0.60                      | 0.45                         | -0.64                      |
| 2009 | -0.30 | 0.33     | 0.26                       | 0.12                         | -0.05                      |
| 2010 | -2.58 | -2.50    | -1.61                      | -0.87                        | -0.01                      |
| 2011 | -1.15 | -0.50    | -0.36                      | 0.43                         | -0.57                      |
| 2012 | 1.15  | 0.67     | -1.07                      | 0.47                         | 1.26                       |
| 2013 | -0.94 | -0.61    | -1.67                      | -0.59                        | 1.65                       |
| 2014 | 0.55  | -0.06    | -0.74                      | 0.00                         | 0.68                       |
| 2015 | 1.41  | 0.11     | 0.83                       | 0.01                         | -0.72                      |

19

20 NAO Hindcast =  $\alpha \times \text{SIC} + \beta \times \text{Z70hPa} + \gamma \times \text{SST}$ , where  $\alpha = 0.925$ ,  $\beta = 0.486$ , and  $\gamma = 0.652$ .

21 The most extreme NAO years are shaded in red ( $>2$ ) and blue ( $<-2$ ), with moderate NAO years  
 22 in light red (1.1~2) and light blue (-2~-1.1).

23

24 **Supplementary Table S2b.** Contributions of individual predictors in the take- $N$ -year-out cross-  
25 validation

|     | Variable | Mode | Month     | $N=1$ | $N=6$ | $N=12$ |
|-----|----------|------|-----------|-------|-------|--------|
| P03 | SIC      | PC1  | October   | 0.38  | 0.32  | 0.35   |
| P04 | Z70hPa   | PC2  | October   | 0.10  | 0.09  | 0.10   |
| P17 | SST      | PC3  | September | 0.15  | 0.13  | 0.08   |

26

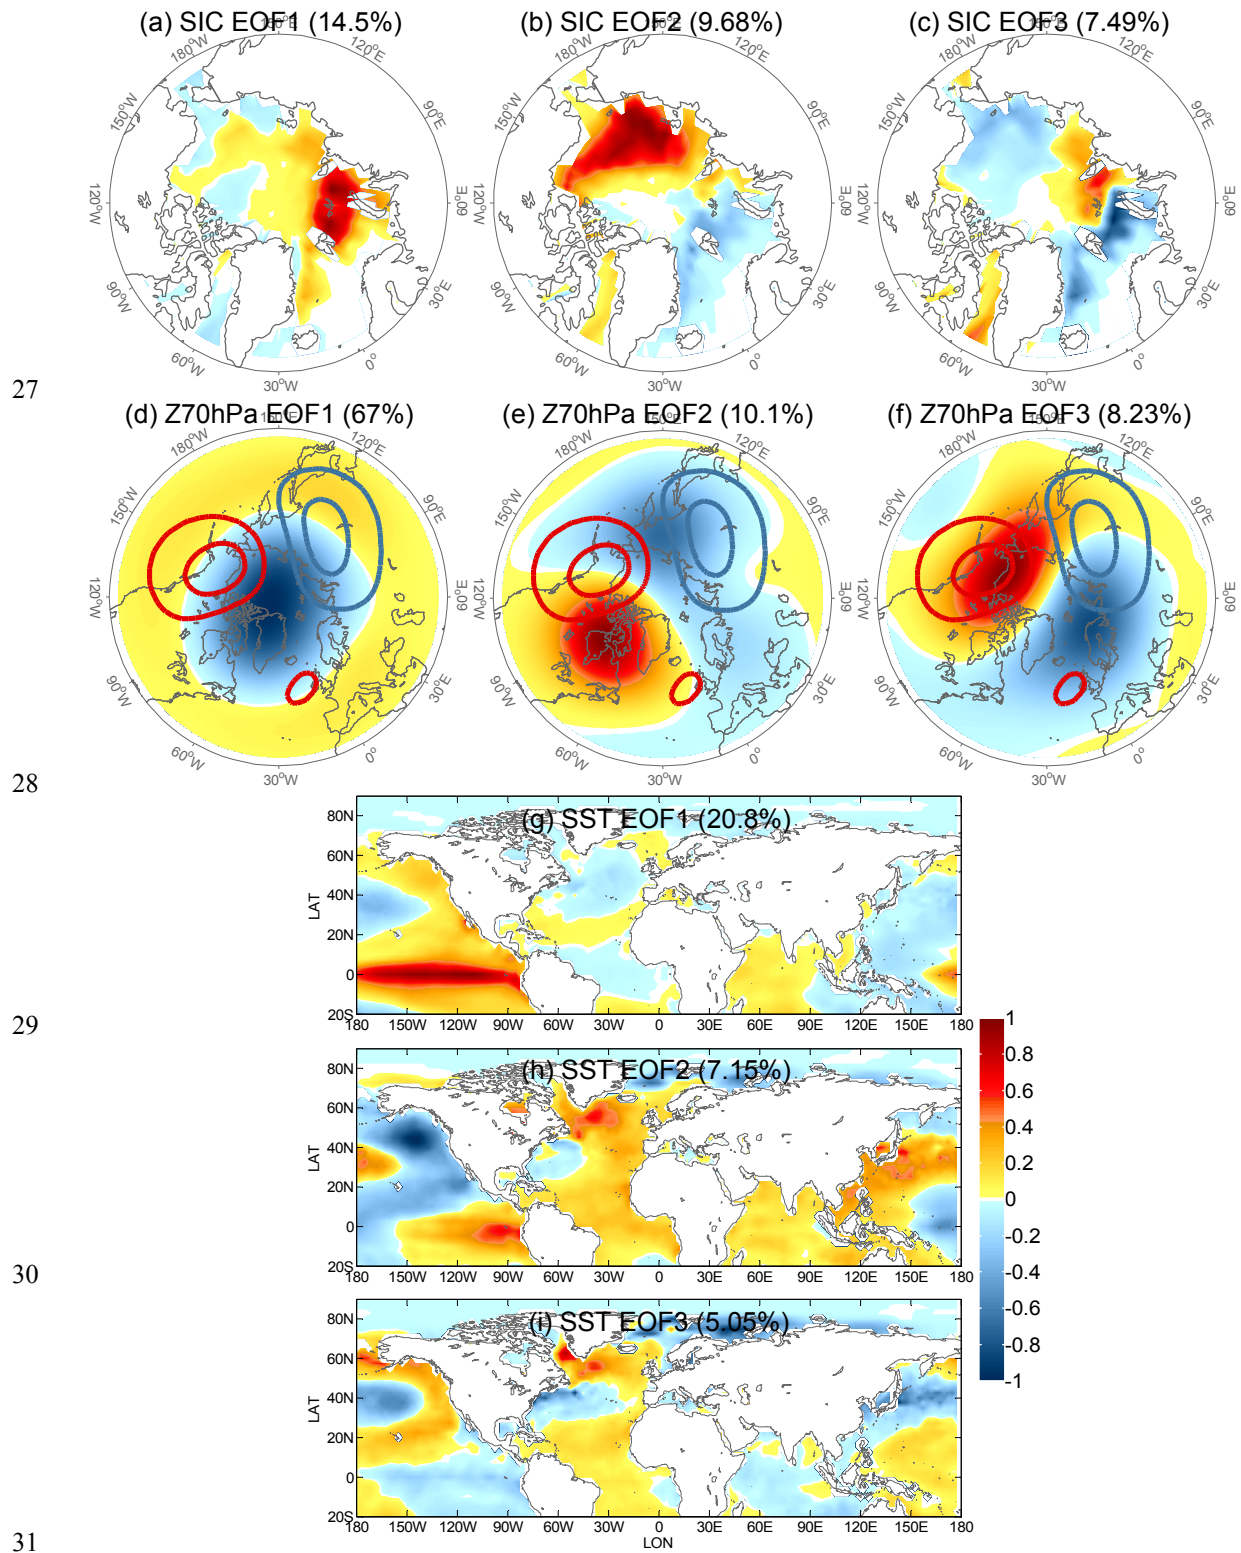

27

28

29

30

31

32 **Supplementary Figure S1.** Same as Fig. 2a-2c but for SONDJF EOF patterns (in normalized  
 33 units) of the first three modes of SIC, Z70hPa, and SST. The maps were generated by  
 34 MathWorks MATLAB R2013b with M\_Map (<http://www.eos.ubc.ca/~rich/map.html>).

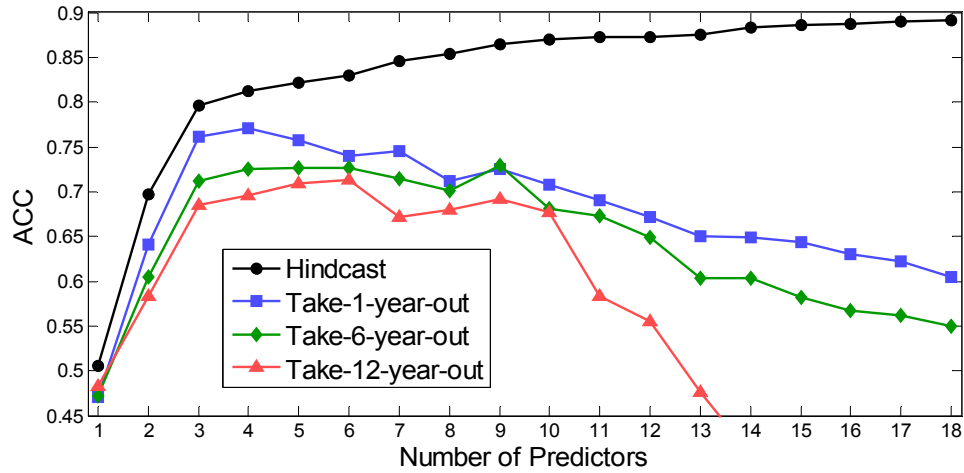

35

36 **Supplementary Figure S2.** Forecast skill (anomaly correlation coefficient) of the MLR model  
 37 as a function of the number of predictors in the forward stepwise selection.

38

39

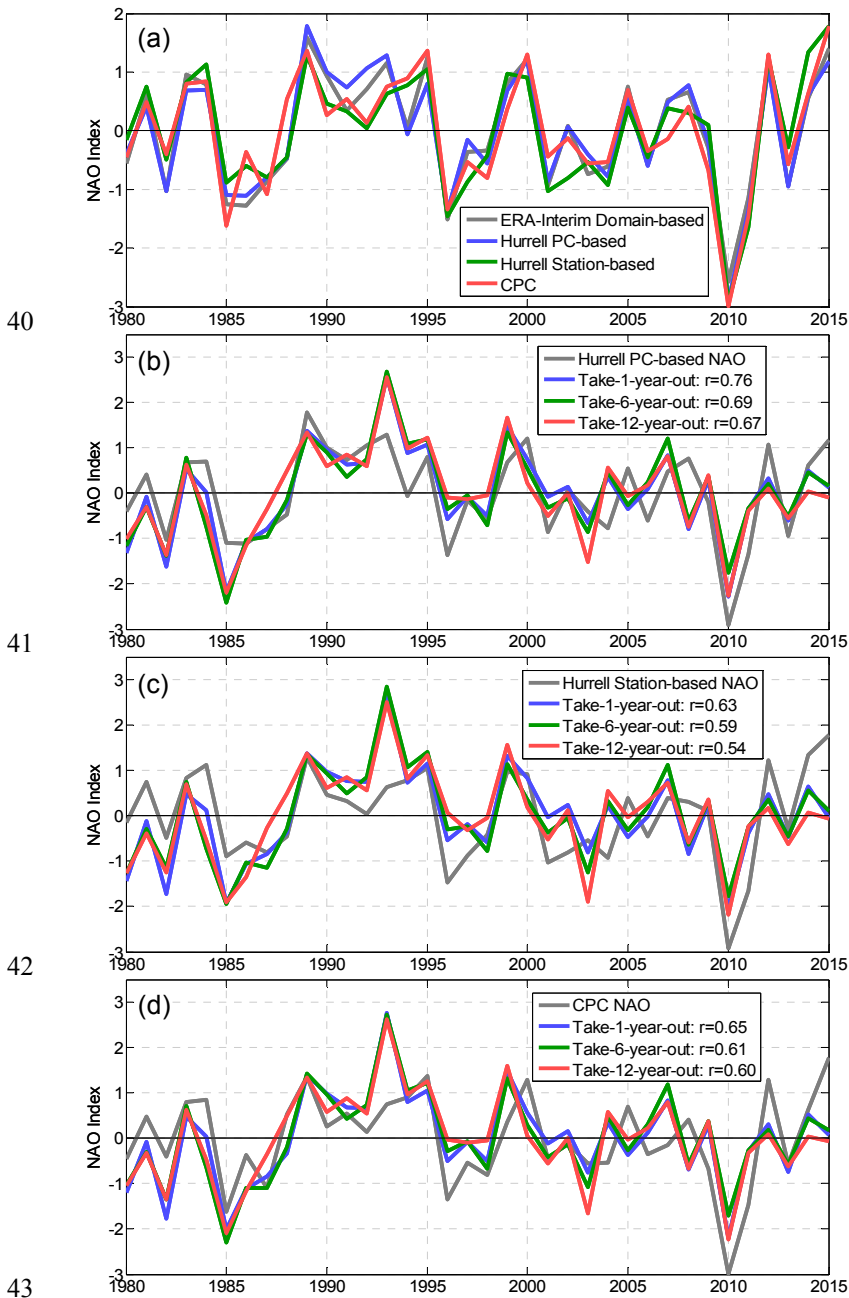

44 **Supplementary Figure S3.** (a) The DJF-mean NAO index for the 1980-2015 period with  
 45 different definitions. (b) The Hurrell PC-based DJF-mean NAO index and its predictions for the  
 46 1980-2015 period. Same as (b) but for the (c) Hurrell Station-based and (d) CPC NAO  
 47 definitions.

48



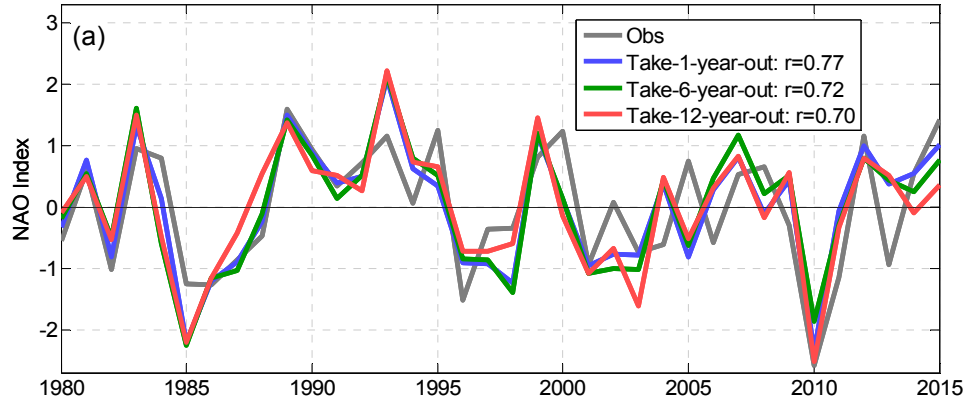

49

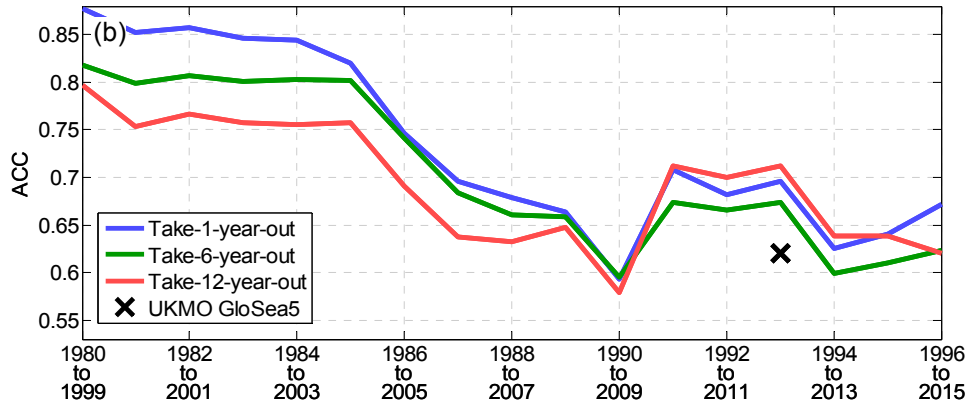

50

51 **Supplementary Figure S4.** Same as Fig. 1 but with a third-order polynomial trend (instead of a  
 52 linear trend) removed from SIC at each grid point.

53

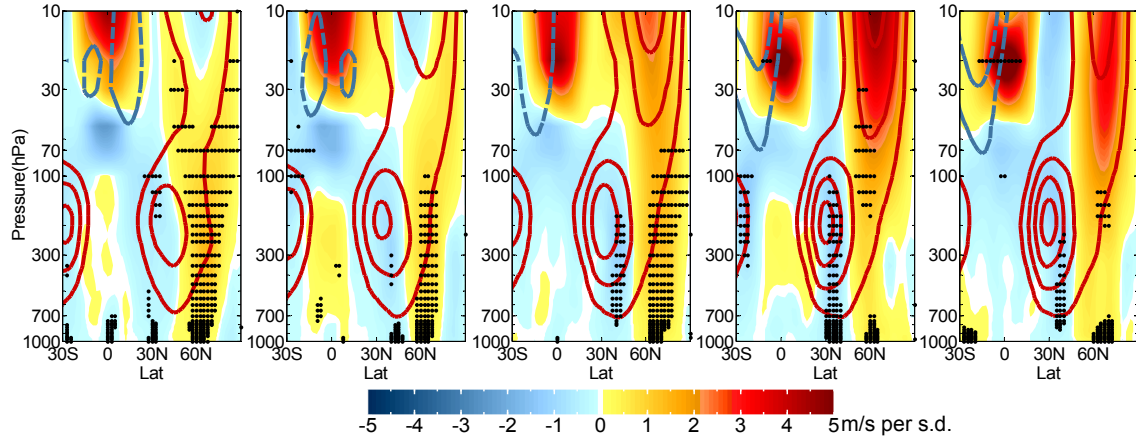

54

55

56 **Supplementary Figure S5.** October-December (left to right) zonal mean zonal wind regressed  
 57 on the October Z70hPa PC 2 (shaded), compared with climatological mean states (contours with  
 58 an interval of 10 m/s). The black dots indicate the 95% confidence interval of the regression  
 59 based on a two-tailed *t*-test. The positive/negative values are shown in red/blue, respectively.

60

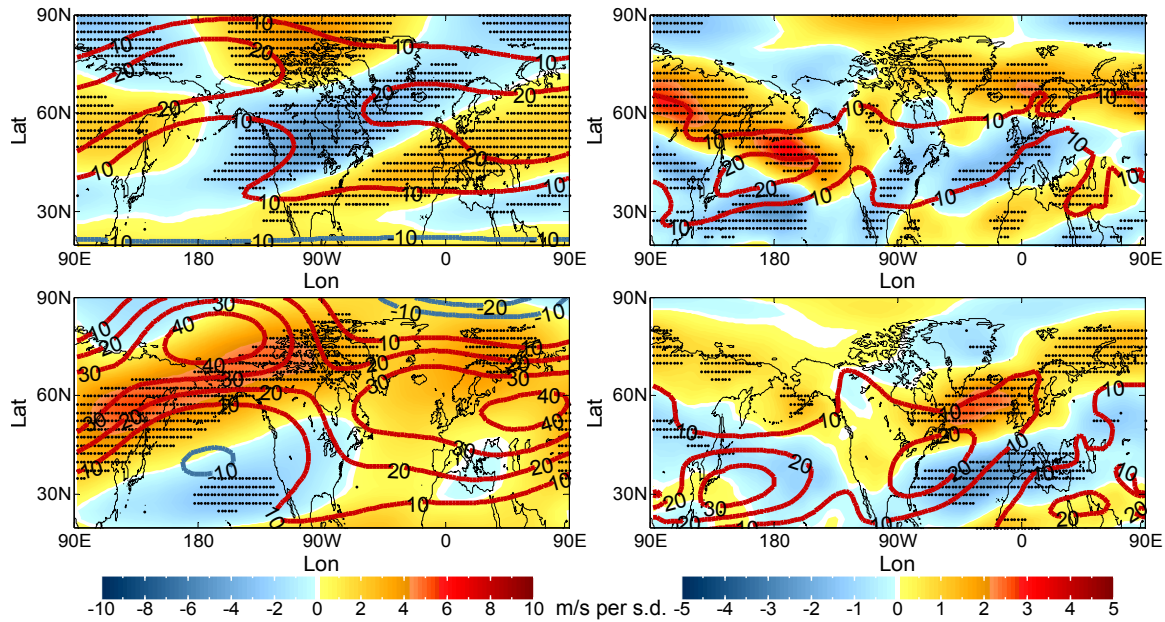

61

62

63

64 **Supplementary Figure S6.** October (top) and DJF-mean (bottom) zonal wind regressed on  
 65 October Z70hPa PC 2 on 10hPa (left) and 500hPa (right) pressure levels (shaded), compared  
 66 with climatological mean states (contours with an interval of 10 m/s; positive/negative values in  
 67 red/blue, respectively). The black dots indicate the 95% confidence interval of the regression  
 68 based on a two-tailed *t*-test. The maps were generated by MathWorks MATLAB R2013b with  
 69 M\_Map (<http://www.eos.ubc.ca/~rich/map.html>).

70

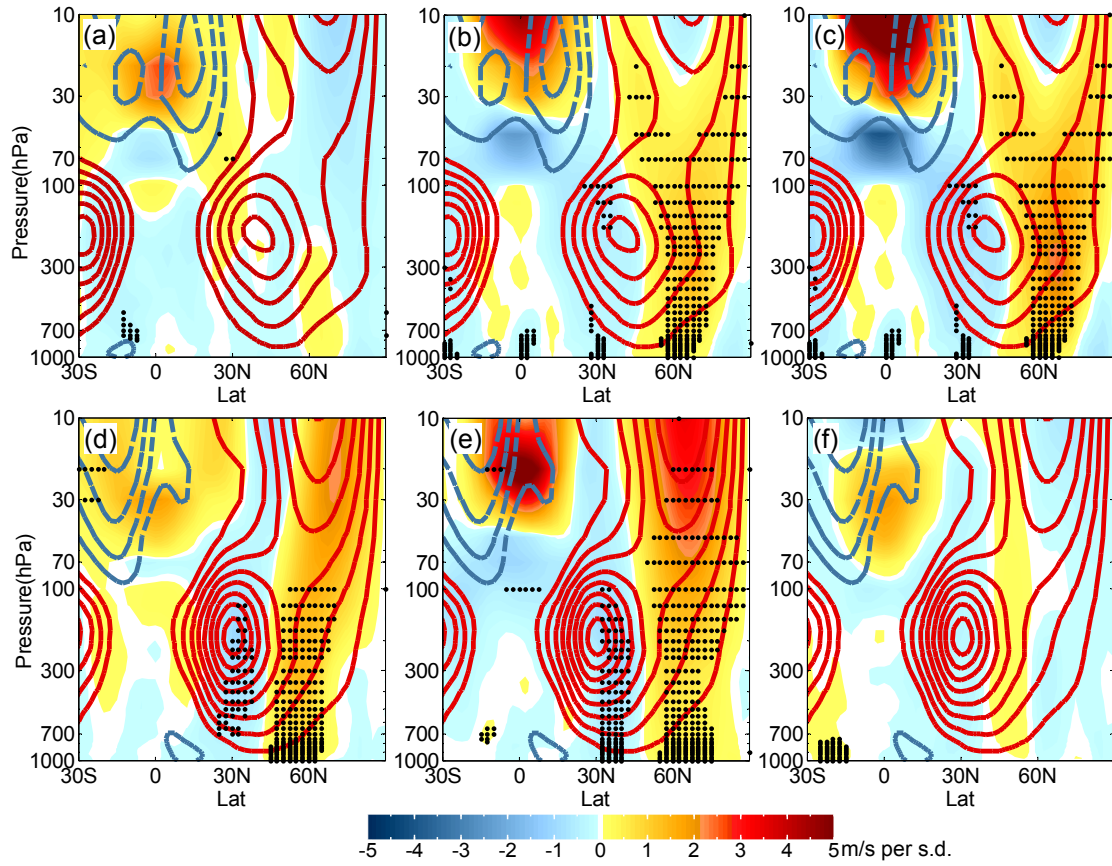

71

72

73

74

75

76

77

78

**Supplementary Figure S7.** Same as Fig. 4 but for October zonal mean zonal wind regressed on (a) October SIC PC1, (b) October Z70hPa PC2, and (c) September SST PC3. (d-f) Same as (a-c) but for the DJF-mean zonal mean zonal wind.

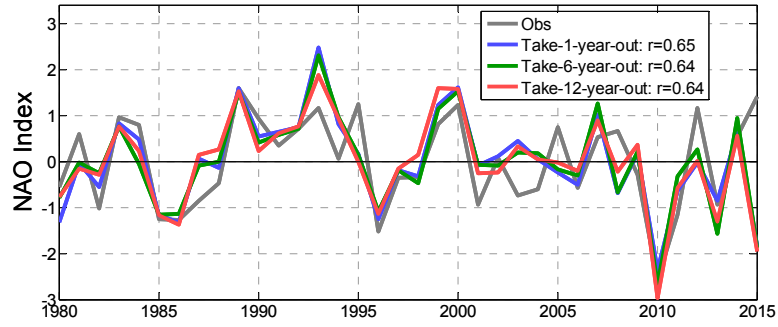

79

80 **Supplementary Figure S8.** Same as Fig.1a but for cross-validated forecast of NAO index with  
 81 October Z70hPa PC2 replaced by SAI.

82
